# Supplementary material for: Histomorphological and Immunophenotypic Features of Pill-Induced Esophagitis
Source: PLoS One. 2015 Jun 5;10(6):e0128110. doi: 10.1371/journal.pone.0128110 (PMC4457729; doi:10.1371/journal.pone.0128110)
Supplement: S1 File — (XLSX) [file pone.0128110.s003.xlsx]

## Sheet: Sheet1
Dx(1pill, 2reflux, 3contol)	Sex(1M, 2Female)	age	esoph symtom(No vomi/melena)	Location(1Distal, 2Mid,3prox)	bleeding	kissing ulcer	stricture	pill impact	coating with drug	Cause(No warfarin/biophsohonate/acetaminophene)	before sleeping	F-U	Lesion on Endosco,at f/u	Sytemic Dz(No osteoporosis)	CD3_ep	L26_ep	CD56_ep	CD3stro	L26stro	CD56stro	CD68stro	ckit_stro	STAT3_ep	mTOR_ep	Eosinophil	Eosino,grade	EO_abscess	SquiggleLympho	Neutrophil	Vesi_n,promi nucleol	Dilated intercell	vacuole	pustule_ep	Basal thick	Papil_Elongation
1	1	20	odynophagia,chest pain	2	0	0	0	0	0		0	1	half size,2M	0	32	2	0	100	60	0	0	15	15	1	0	0	0	1	0	0	2	1	0	4	0
1	1	20	odynophagia,chest pain	2	0	0	0	0	0		0	1	half size,2M	0	39	1	4	110	65	0	9	2	2	0	2	1	0	1	0	0	0	2	0	4	0
1	1	52	odynophagia,dysphagia	2	0	0	1	0	0	NSAID	0	1	Normal,1M	0	2	10	6	120	60	0	0	18	18	1	5	1	0	1	0	0	0	0	0	2	1
1	2	27	dysphagia, chest pain	2	1	1	0	0	0	antibiotics	0	1	Normal, 2M	0	0	0	0	180	40	0	20	20	20	0	4	1	0	1	0	0	1	1	0	0	0
1	2	27	dysphagia, chest pain	2	1	1	0	0	0	antibiotics	0	1	Normal,2M	0	2	0	0	35	40	0	0	10	10	1	0	0	0	0	0	0	0	0	0	0	0
1	1	75	odynophagia,dysphagia	2	0	0	0	0	0	antibiotics	0	1	Normal,2M	0	15	5	0	140	20	0	0	42	42	0	16	2	0	1	0	0	1	1	0	2	0
1	1	17	odynophagia	2	0	1	0	0	0	vit C	0	0	x	0	30	4	0	90	80	0	1	14	14	0	13	2	0	1	0	0	2	1	0	4	0
1	1	56	chest pain	2	0	1	0	0	0	antihypertensive drug, anti-diabetes	0	0	x	HT,DM	0	1	2	70	20	0	0	23	23	0	1	1	0	0	1	0	0	0	0	2	0
1	2	33	odynophagia, chest patin	1	1	0	0	0	0	antibiotics	0	0	x	0	0		0	130	120	3	0	32	32	0	0		0	0	0	0	0	0	0	0	0
1	2	51	dysphagia	2	1	1	0	0	0	NSAID,antibiotics	0	0	x	0	10	0	6	100	290	7	7	28	28	1	0	0	0	0	0	0	1	1	0	0	0
1	2	63	dysphagia	1											8	0	0						0	1	2	1	1	0	1	0	3	1	1	4	0
1	1	57	chest patin	1	1	0	0	0	0	NSAID	0	1	Normal	HT,CRF,Cer infarction	3	0	0						0	1	2	1	0	0	0	0	2	1	1	0	0
1	2	66	chest patin	2	0	0	0	0	0	NSAID,antihypertensive drug	0	0	x	HT	33	4	6	28	7	1	0	25	25	0	16	2	1	0	0	0	2	1	0	0	0
1	2	44	chest patin	2	0	0	0	0	0	antibiotics	0	0	x	0	7	1	1	180	55	0	2	20	20	0	5	1	0	1	1	0	0	0	0	0	0
1	2	30	odynophagia,dysphagia	3	0	0	0	0	0	NSAID,antibiotics	0	0	x	0	11	0	1	160	75	1	0	14	14	0	16	2	0	0	1	0	2	1	0	4	0
1	2	73	chest patin	2	0	1	0	0	0	위장약	0	0	x	0	3	2	4	90	25	0	0	3	3	1	0	0	0	0	0	0	0	1	0	4	1
1	1	26	chest patin	2	1	1	0	0	0	NSAID,antibiotics	0	0	x	0	15		1	170	90	2	1	17	17	0	56	3	1	1	1	0	2	1	0	4	0
1	2	35	odynophagia,dysphagia	2	0	1	0	0	0	NSAID, antibiotics	0	0	x	0	6	0	2			0			0	1	1	1	0	0	0	0	0	1	0	0	1
1	1	80	odynophagia,dyspjagia	1	0	0	1	0	0	NSAID, anti-diabetes	0	0	x	HT,DM, Af	11	0	2	50	0	0		8	8	1	1	1	0	0	0	0	0	0	0	0	1
1	1	19	dysphagia	1	0	1	0	0	0	NSAID	0	0	x	0	19	1	1	130	140	1	48	24	24	0	0	0	0	1	0	0	1	0	0	1	1
1	1	31	odynophagia	2	0	0	0	0	0	antibiotics	1	0	x	0	23	1	3	90	150	3	40	22	22	1	1	1	0	1	0	0	0	1	0	1	0
1	2	22	odynophagia	2	1	0	0	0	0	antibiotics	1	0	x	0	11	0	0	100	70	2	120	25	25	0	4	1	0	1	0	0	1	1	0	1	0
2	1	47		1											15	3	2	80	132	0	0	0	0	0	2	1	0	0	0	1	0	0	0	0	1
2	1	74		1											10	3	4	110	15	0	0	14	14	0	1	1	0	0	0	1	0	0	0	0	1
2	2	76		1											8	1	3	15	25	0	0	0	0	0	2	1	0	1	0	1	0	0	0	0	1
2	1	84		1											9	0	4				0		0	1	0	0	0	0	0	1	0	0	0	0	1
2	1	62		1											10	0	2	25	3	3	0	12	12	0	2	1	0	0	0	1	1	1	0	1	1
2	2	73		1											9	0	7	70	60	0	0	36	36	0	2	1	0	1	0	1	1	1	0	0	1
2	1	35		1											7	2	0	170	45	0	0	7	7	0	2	1	0	0	0	1	1	1	0	4	0
2	1	56		1											25	0	0	40	125	0	0	24	24	0	0	0	0	0	0	1	1	1	0	4	0
2	1	49		1											10	2	0	130	155	2	0	32	32	0	4	1	0	1	1	1	0	0	0	1	1
2	1	91		1											67	4	7						0	1	28	2	0	1	0	0	1	1	0	1	1
2	2	64		1											5	0	0	140	45	1	4	25	25	0	10	2	0	0	0	1	1	1	0	4	0
2	1	53		1											13	0	4	180	65	3	4	32	32	1	9	1	0	1	1	1	1	1	0	4	0
2	1	48		1											15	0	2	250	500	0	0	38	38	1	0	0	0	0	0	0	0	1	0	1	1
2	1	49		1											6	0	2	75	17	1	0	5	5	0	1	1	0	0	0	1	1	1	0	4	1
2	1	48		1											20	0	4	110	270	1	0	45	45	1	0	0	0	1	0	1	0	0	0	1	1
2	2	66		1											10	0	2		4	0		45	45	1	15	2	0	1	1	1	0	0	0	0	0
2	2	64		1											15	0	2	60	16	0	1	22	22	1	0	0	0	1	0	0	0	0	0	0	0
2	1	47		1											7	0	3						0	1	1	1	0	0	0	0	0	0	0	0	1
2	1	70		1											9	0	0	32	4	2	0	70	70	0	3	1	0	1	0	0	0	0	0	1	0
2	1	67		1											3	0	2	60	90	0	0	7	7	0	1	1	0	0	0	0	0	0	0	0	0
3	1	49		2											9	0	3			0			0	0	1	1	0	0	0	0	0	0	0	0	0
3	1	73		2											9	0	7	10	35	3	0	46	46	0	1	1	0	0	0	0	0	0	0	0	1
3	2	40		1											26	0	2			0			0	0	1	1	0	1	0	0	0	0	0	4	0
3	1	34		1											55	0	2			0			0	0	0	0	0	1	0	1	0	0	0	0	1
3	1	45		1											8	0	2			0			0	1	0	0	0	0	0	0	0	0	0	0	0
3	1	63		2											9	0	3	10	150	2	0	43	43	0	0	0	0	1	0	0	0	1	0	0	1
3	1	52		1											5	0	2	40	35	2	0	28	28	0	0	0	0	0	0	0	0	0	0	0	0
3	2	60		2											7	0	0			0			0	0	0	0	0	0	0	0	0	0	0	0	0
3	1	65		1											23	0	3	17	0	0	0	12	12	0	0	0	0	0	0	0	0	1	0	1	0
3	1	38		1											19	0	1			0			0	0	0	0	0	1	0	0	0	1	0	1	1
3	2	30		2											12	0	3			0			0	0	0	0	0	1	0	0	0	0	0	0	0
3	2	47		2											20	0	1			0			0	0	1	1	0	0	0	0	1	0	0	0	0
3	1	36		2											12	0	3			0			0	0	0	0	0	1	0	0	0	0	0	0	0
3	2	56		1											28	0	2			0			0	0	0	0	0	1	0	0	0	0	0	0	0
